# Supplementary material for: One-pot synthesis of dopamine dithiocarbamate functionalized gold nanoparticles for quantitative analysis of small molecules and phosphopeptides in SALDI- and MALDI-MS
Source: Royal Society of Chemistry journal article supplement (doi:10.1039/c2an16008k), 2012-01-01
Supplement: c2an16008k.pdf [file c2an16008k.pdf]

**Supporting Information**  
**One-pot synthesis of dopamine dithiocarbamate functionalized gold nanoparticles for quantitative analysis of small molecules and phosphopeptides in SALDI- and MALDI-MS**

**Suresh Kumar Kailasa,<sup>a,b,c</sup> and Hui-Fen Wu,<sup>a,b,d\*</sup>**

<sup>a</sup>Department of Chemistry, National Sun Yat-Sen University, Kaohsiung, 80424, Taiwan

<sup>b</sup>Center for Nanoscience and Nanotechnology, National Sun Yat-Sen University, Kaohsiung, 80424, Taiwan

<sup>c</sup>Department of Applied Chemistry, S. V. National Institute of Technology, Surat – 395007, India

<sup>d</sup>Doctoral Degree Program in Marine Biotechnology, National Sun Yat-Sen University, Kaohsiung 80424, Taiwan

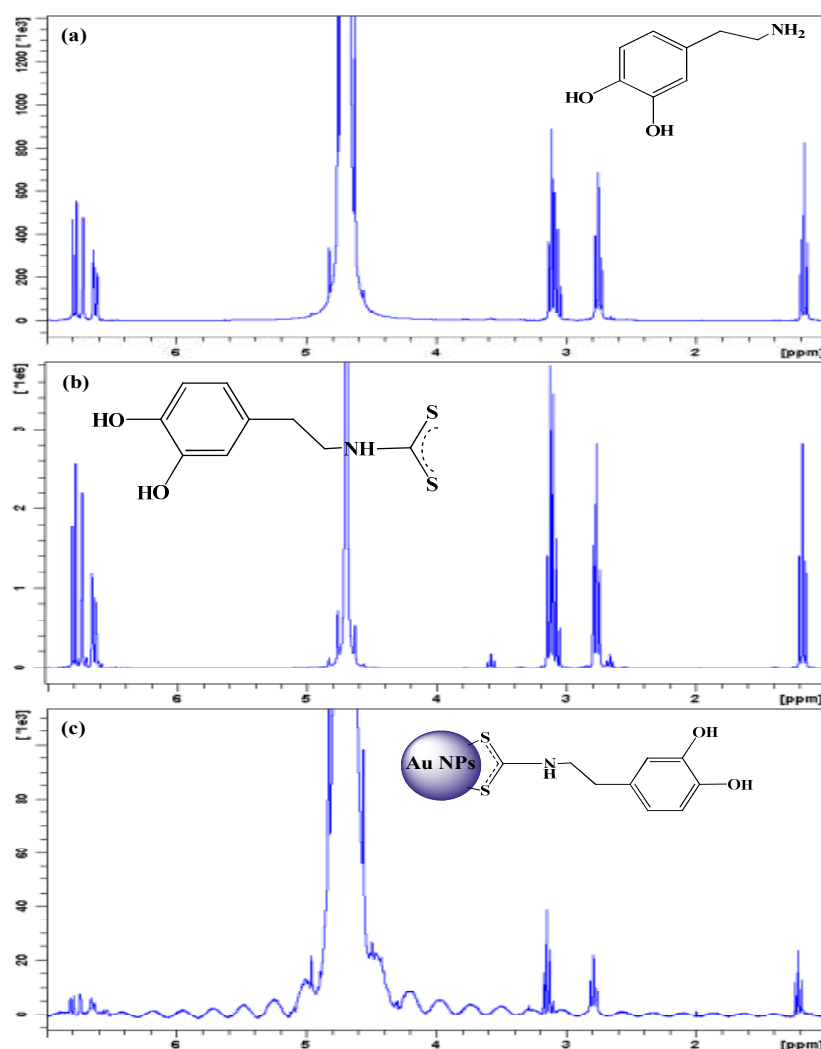

**Figure S1.** <sup>1</sup>H NMR spectra of (a) pure dopamine (b) dopamine dithiocarbamate and (c) DDTC-Au NPs.

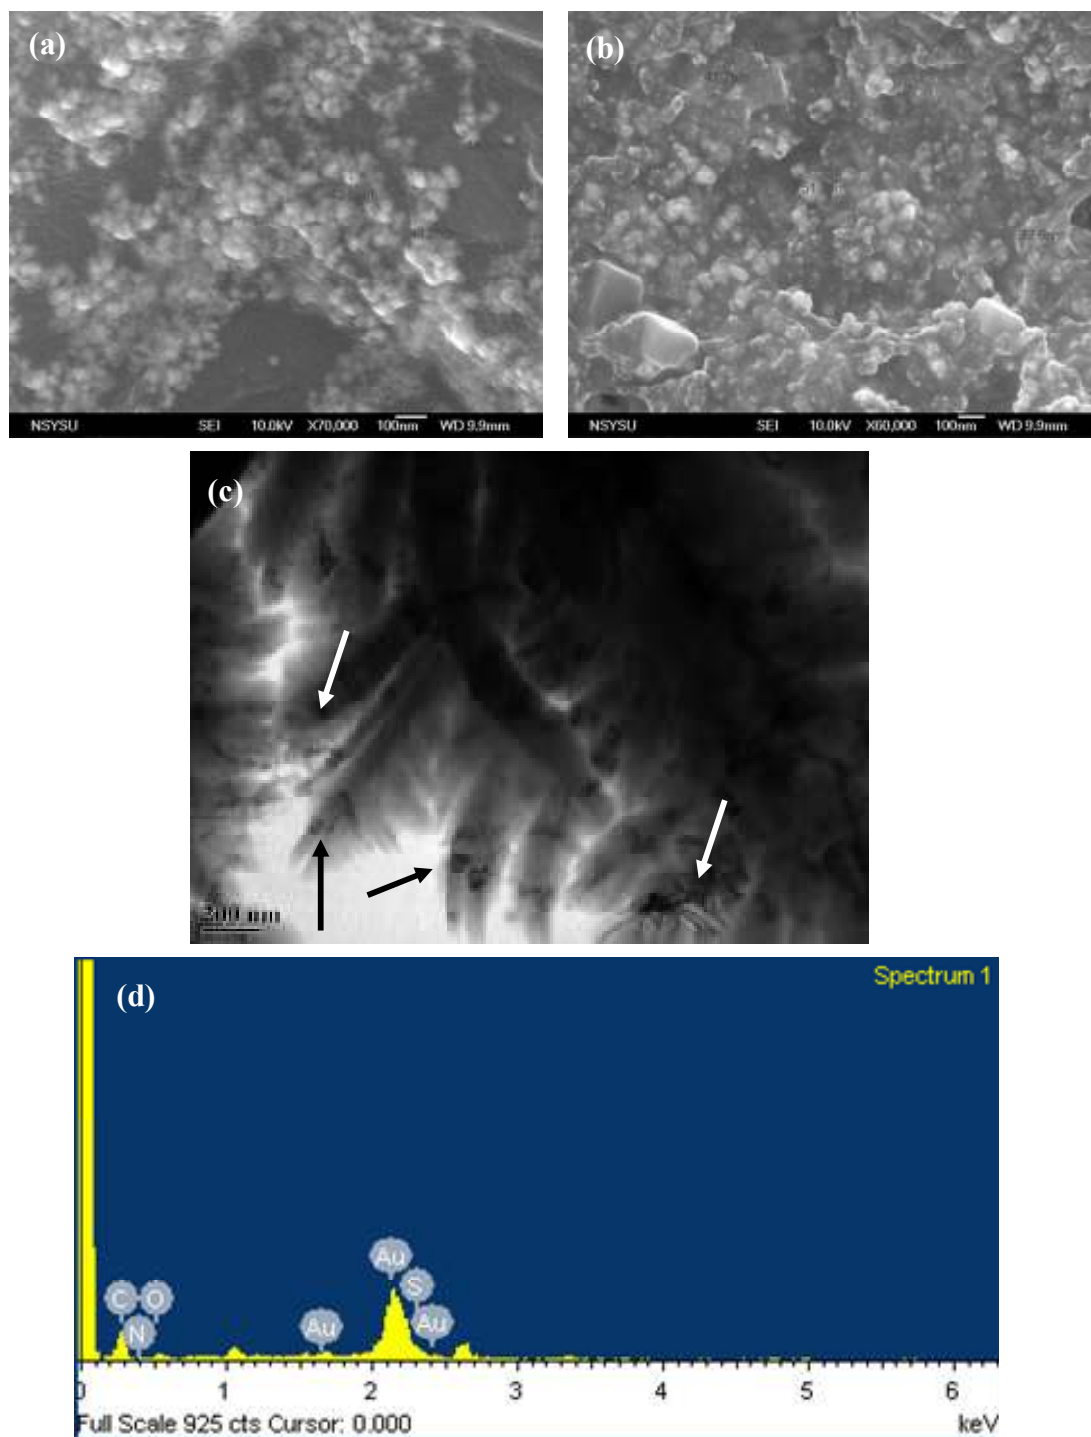

**Figure S2.** SEM images of (a) bare Au NPs and (b) DDTC-Au NPs. (c) TEM image of DDTC-Au NPs. (d) The energy dispersive X-ray spectra (EDXS) of DDTC-Au NPs and the spectrum has shown the elemental signals of dopamine dithiocarbamate functionalized-Au NPs.

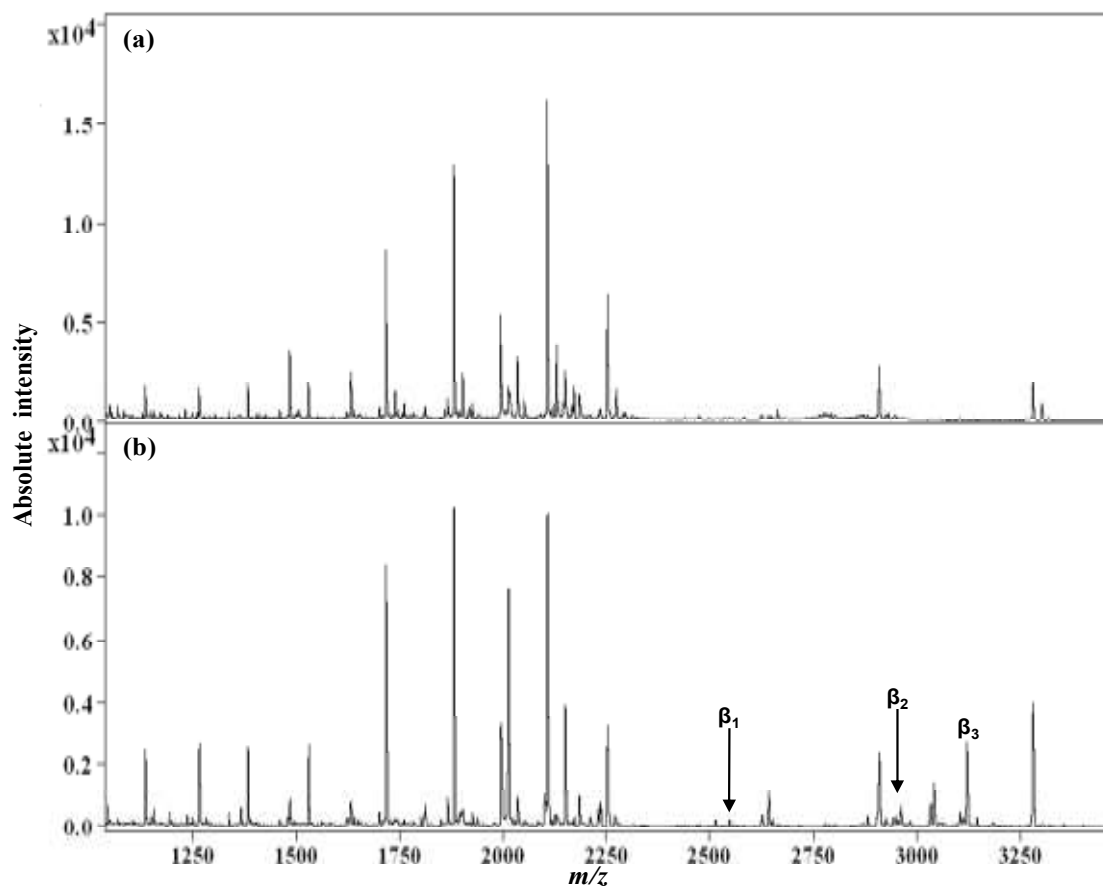

**Figure S3.** MALDI mass spectra of microwave tryptic digest of  $\beta$ -casein at 50 s microwave irradiating time using (a) 2,5-DHB and (b) using DDTC-Au NPs as affinity probes along with 2,5-DHB as the matrix. Microwave conditions are same those shown in Figure 6.

**Table S1.** List of phosphopeptides ion peaks detected from microwave tryptic digests of  $\alpha$ -casein and  $\beta$ -casein using DDTC-Au NPs as affinity probes.

| Protein          | Peak number   | Observed <i>m/z</i> | Phosphopeptide sequences                            |
|------------------|---------------|---------------------|-----------------------------------------------------|
| $\alpha$ -casein | $\alpha_1$    | 924.4               | DIGpSESTEDQAMEDIK ( $\alpha$ -S1/58-73)             |
|                  | $\alpha_2$    | 952.7               | EKVNELpSKDIGpSESTEDQAMEDIK ( $\alpha$ -S1/52-73)    |
|                  | $\alpha_3$    | 976.2               | YKVPQLEIVPNpSAEER ( $\alpha$ -S1/119-134)           |
|                  | $\alpha_4$    | 1003.3              | NANEEEYSIGpSpSpSEEpSAEVATEEVK ( $\alpha$ -S2/61-85) |
|                  | $\alpha_5$    | 1103.7              | GNAEGpSpSDEEGKLVIDEPAK ( $\alpha$ -S1/180-188)      |
|                  | $\alpha_6$    | 1251.6              | TKVIPYVRYL ( $\alpha$ -S2-(213-222)                 |
|                  | $\alpha_7$    | 1267.1              | YLGYLEQLLR ( $\alpha$ -S1/106-115)                  |
|                  | $\alpha_8$    | 1337.5              | VNELpSKDIGpSEpSTEDQAMEDIK ( $\alpha$ -S1/52-73)     |
|                  | $\alpha_9$    | 1367.1              | QM#EAEpSIpSpSpSEIIVPNpSVEQK ( $\alpha$ -S1/74-94)   |
|                  | $\alpha_{10}$ | 1384.5              | FFVAPFPEVFGK ( $\alpha$ -S1/38-49)                  |
|                  | $\alpha_{11}$ | 1410.3              | EQLpSTpSEENSK ( $\alpha$ -S2/141-151)               |
|                  | $\alpha_{12}$ | 1660.1              | VPQLEIVPNpSAEER ( $\alpha$ -S1/121-134)             |
|                  | $\alpha_{13}$ | 1759.8              | HQGLPQEVLNENLLR ( $\alpha$ -S1/23-37)               |
|                  | $\alpha_{14}$ | 1847.4              | DIGpSETEDQAMEDIK ( $\alpha$ -S1/58-73)              |
|                  | $\alpha_{15}$ | 1951.6              | YKVPQLEIVPNpSAEER ( $\alpha$ -S1/119-134)           |
|                  | $\alpha_{16}$ | 2080.1              | KYKVPQLEIVPNpSAEER ( $\alpha$ -S1/118-134)          |
|                  | $\alpha_{17}$ | 2105.0              | TDAPSFSDIPNPIGSENSEK ( $\alpha$ -S1/189-208)        |
|                  | $\alpha_{18}$ | 2618.7              | NTMEHVpSpSpSEESIIPSQETYK ( $\alpha$ -S1/17-36)      |
|                  | $\alpha_{19}$ | 2678.0              | VNELpSKDIGpSEpSTEDQAMEDIK ( $\alpha$ -S1/52-73)     |
|                  | $\alpha_{20}$ | 3008.1              | NANEEEYSIGpSpSpSEEpSAEVATEEVK ( $\alpha$ -S1/46-70) |
| $\beta$ -casein  | $\beta_1$     | 2556.9              | FQpSEEQQQTEDELQDKIHPF ( $\beta$ /33-52)             |
|                  | $\beta_2$     | 2965.6              | ELEELNVPGEIVepSLpSpSpSEESITR ( $\beta$ /2-25)       |
|                  | $\beta_3$     | 3122.5              | RELEELNVPGEIVepSLpSpSpSEESITR ( $\beta$ /1-25)      |

pS refers to phosphorylated serine unit; M# oxidation on methionine.
